# Supplementary material for: Influence of the diversified structural variations at the imine functionality of 4-bromophenylacetic acid derived hydrazones on alkaline phosphatase inhibition: synthesis and molecular modelling studies
Source: Royal Society of Chemistry journal article supplement (doi:10.1039/c5ra14836g), 2015-01-01
Supplement: c5ra14836g1.pdf [file c5ra14836g1.pdf]

**Influence of the diversified structural variations at the imine functionality of 4-bromophenylacetic acid derived hydrazones on alkaline phosphatase inhibition: Synthesis and molecular modelling studies**

Imtiaz Khan<sup>a</sup>, Aliya Ibrar<sup>a</sup>, Syeda Abida Ejaz<sup>b</sup>, Shafi Ullah Khan<sup>b</sup>, Syed Jawad Ali Shah<sup>b</sup>, Shahid Hameed<sup>a,\*</sup>, Jim Simpson<sup>c</sup>, Joanna Lecka<sup>d,e</sup>, Jean Sévigny<sup>d,e</sup> and Jamshed Iqbal<sup>b,\*</sup>

<sup>a</sup>*Department of Chemistry, Quaid-i-Azam University, Islamabad-45320, Pakistan*

<sup>b</sup>*Centre for Advanced Drug Research, COMSATS Institute of Information Technology, Abbottabad-22060, Pakistan*

<sup>c</sup>*Department of Chemistry, University of Otago, P.O. Box 56, Dunedin, 9054, New Zealand*

<sup>d</sup>*Department of Microbiology-Infectiology and Immunology, Faculty of Medicine, Centre de Recherche du CHU de Québec – Université Laval, Québec, QC, G1V 4G2, Canada*

<sup>e</sup>*Centre de Recherche du CHU de Québec – Université Laval, Québec, QC, Canada*

**Supporting Information**

**X-ray crystallographic analysis**

The X-ray diffraction measurements were carried out for the synthesized compounds **4i** and **4q**. The crystal and instrumental parameters used in the unit cell determination, the data collection, and structure refinement parameters are presented in the Table S1 with selected bond lengths and angles in Table S2.

Table S1 Crystal data and structure refinement for **4i** and **4q**

| Structural parameters                            | Compound <b>4i</b>                                              | Compound <b>4q</b>                                 |
|--------------------------------------------------|-----------------------------------------------------------------|----------------------------------------------------|
| Empirical Formula                                | C <sub>18</sub> H <sub>17</sub> BrN <sub>2</sub> O <sub>2</sub> | C <sub>21</sub> H <sub>17</sub> BrN <sub>2</sub> O |
| Formula weight (g/mol)                           | 373.24                                                          | 393.27                                             |
| Temperature (K)                                  | 100(2)                                                          | 100(2)                                             |
| Wavelength (Å)                                   | 1.5418                                                          | 1.5418                                             |
| Crystal system                                   | Monoclinic                                                      | Monoclinic                                         |
| Space group                                      | P 2 <sub>1</sub> /n                                             | P c                                                |
| Unit cell dimensions (Å)                         |                                                                 |                                                    |
|                                                  | $a = 14.6957(3), \alpha = 90^\circ$                             | $a = 20.4423(11), \alpha = 90^\circ$               |
|                                                  | $b = 4.8449(11), \beta = 102.2190(2)^\circ$                     | $b = 5.5758(3), \beta = 98.6210(7)^\circ$          |
|                                                  | $c = 23.1542(5), \gamma = 90^\circ$                             | $c = 7.6350(7), \gamma = 90^\circ$                 |
| Volume (Å <sup>3</sup> )                         | 1611.23(6)                                                      | 860.43(10)                                         |
| Z                                                | 4                                                               | 2                                                  |
| D <sub>calc</sub> (gcm <sup>-3</sup> )           | 1.539                                                           | 1.518                                              |
| $\mu$ (mm <sup>-1</sup> )                        | 3.571                                                           | 3.335                                              |
| F (000)                                          | 760                                                             | 400                                                |
| Crystal size (mm <sup>3</sup> )                  | 0.20 × 0.03 × 0.03                                              | 0.20 × 0.18 × 0.06                                 |
| Theta range for data collection (°)              | 3.277 to 76.730                                                 | 4.375 to 76.12                                     |
| Reflections collected                            | 7820                                                            | 7517                                               |
| Independent reflections                          | 3335 [R <sub>int</sub> = 0.0662]                                | 3007 [R <sub>int</sub> = 0.0657]                   |
| Reflections observed                             | 2903                                                            | 2814                                               |
| Min. and max. transmission                       | 1.00000 and 0.51682                                             | 1.00000 and 0.51682                                |
| Data/restraints/parameters                       | 3335 / 37 / 211                                                 | 3007 / 8 / 229                                     |
| Goodness-of-fit on F <sup>2</sup>                | 1.039                                                           | 1.130                                              |
| Final R indices [I > 2σ(I)]                      | R <sub>1</sub> = 0.0531, wR <sub>2</sub> = 0.1342               | R <sub>1</sub> = 0.0858, wR <sub>2</sub> = 0.2443  |
| R indices (all data)                             | R <sub>1</sub> = 0.0616, wR <sub>2</sub> = 0.1408               | R <sub>1</sub> = 0.0914, wR <sub>2</sub> = 0.2495  |
| Absolute structure parameter                     | -                                                               | 0.01(4)                                            |
| Largest diff. peak and hole (e Å <sup>-3</sup> ) | 1.164 and -1.149                                                | 3.267 and -0.995                                   |
| CCDC reference number                            | 1401865                                                         | 1401866                                            |

**Table S2** Selected bond lengths, (Å), and angles, (°), for **4i** and **4q**

|                        | <b>Compound 4i</b> | <b>Compound 4q</b> |
|------------------------|--------------------|--------------------|
| <b>Bond length (Å)</b> |                    |                    |
| O2-C2                  | 1.369(4)           | -                  |
| O2-C21                 | 1.414(4)           | -                  |
| C21-C22                | 1.494(4)           | -                  |
| C22-C23                | 1.317(5)           | -                  |
| C1-C1'                 | -                  | 1.48(2)            |
| C4-C7                  | -                  | 1.447(19)          |
| C1-C7                  | 1.465(4)           | -                  |
| C7-N1                  | 1.281(4)           | 1.281(9)           |
| N1-N2                  | 1.377(3)           | 1.332(17)          |
| N2-C8                  | 1.348(4)           | 1.385(19)          |
| C8-O1                  | 1.238(3)           | 1.23(2)            |
| C8-C9                  | 1.514(4)           | 1.50(2)            |
| C9-C11                 | 1.512(4)           | 1.50(3)            |
| C14-Br14               | 1.908(3)           | 1.882(15)          |
| <b>Bond angles (°)</b> |                    |                    |
| C2-C1-C1'              | -                  | 119.8(13)          |
| C2'-C1'-C1             | -                  | 122.3(13)          |
| C23-C22-C21            | 126.9(3)           | -                  |
| C22-C21-O2             | 109.1(2)           | -                  |
| C1-C7-N1               | 120.9(2)           | -                  |
| C4-C7-N1               | -                  |                    |
| C7-N1-N2               | 113.7(2)           | 118.5(13)          |
| N1-N2-C8               | 122.3(2)           | 119.5(13)          |
| N2-C8-O1               | 120.0(2)           | 120.9(14)          |
| C8-C9-O1               | 121.7(2)           | 123.5(15)          |
| N2-C8-C9               | 118.3(2)           |                    |

## Structural description

In the molecular structure of the **4i**, the (allyloxy)benzylidene)acetohydrazide segment of the molecule is close to planar with an root-mean-square (rms) deviation of 0.0315 Å from the best fit meanplane through all 15 non-hydrogen atoms. This plane is inclined at 64.83(6)° to the bromophenyl ring plane. Bond lengths in the C7—N1—N2—C8—O8 section of the molecule, Table S2, suggest a considerable degree of delocalization that would contribute to this planarity. In **4q**, the allyloxybenzene substituent is replaced by a biphenyl. This somewhat destroys the planarity of the biphenyl-4-ylmethylene-acetohydrazide segment of the molecule despite the biphenyl itself being reasonably planar, rms deviation 0.0346 Å for the 12 non-hydrogen atoms and the two phenyl rings inclined to one another at an angle of 3.7(6)°. The biphenyl plane is inclined to that through the C7—N1—N2—C8—O8 section of the molecule at 25(1)° while this plane subtends an angle of 52.0(7)° to the plane of the bromophenyl substituent. The delocalization in the central section of the molecule noted for **4i** clearly extends to **4q**, Table S2. Structures of compounds with an (*E*)-*N'*-benzylidene-2-phenylacetohydrazide framework are scarce, with only 4 unique examples in the Cambridge Structural Database.<sup>1</sup> These vary only in the substituents on the benzene rings of the benzylidene and/or the phenylacetohydrazide units,<sup>2-5</sup> and none closely resemble the two molecules reported here.

In the crystal structure of **4i**, inversion dimers form through classical N—H...O hydrogen bonds, Table S3, supported by C—H...O contacts and these dimers are stacked along the *b* axis in a three-dimensional network (Fig. S1). For **4q** dimers again form through N—H...O hydrogen bonds, Table S3, supported in this instance by C—H...O and C—H...Br contacts. Additional C—H...O contacts generate a three dimensional network of molecules stacked along the *c* axis direction (Fig. S2).

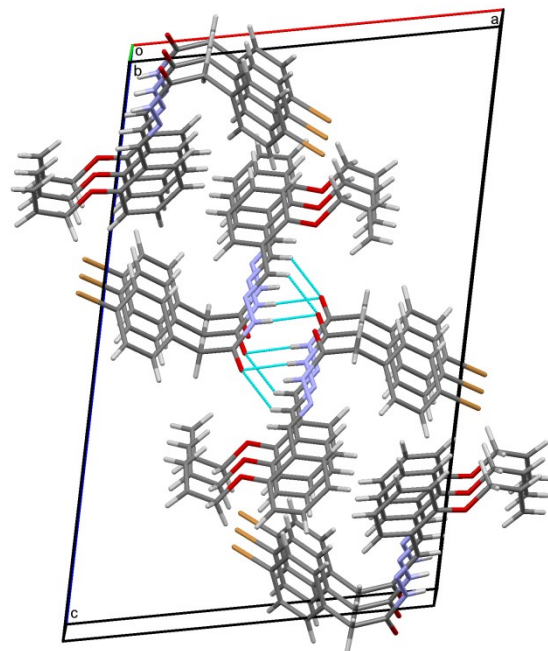

**Fig. S1** Three-dimensional network of **4i** along *b* axis.

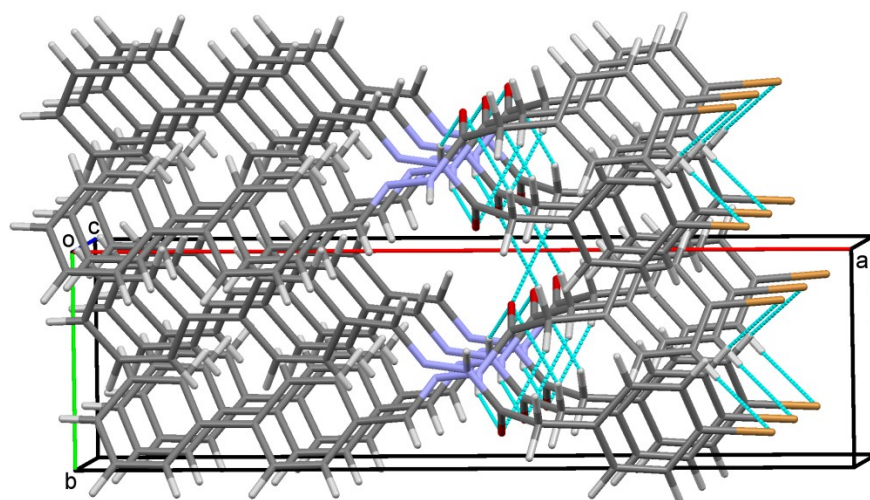

**Fig. S2** Three-dimensional network of **4q** along *c* axis.

Table S3 Hydrogen bond geometry for **4i** and **4q** [Å, and °]

| Compound  | D-H...A                        | d(D-H)    | d(H...A) | d(D...A)  | <(DHA)  |
|-----------|--------------------------------|-----------|----------|-----------|---------|
| <b>4i</b> | N2—H2N...O8 <sup>Ii</sup>      | 0.783(19) | 2.09(2)  | 2.874(3)  | 176(4)  |
|           | C7—H7...O8 <sup>Ii</sup>       | 0.95      | 2.68     | 3.464(3)  | 141     |
| <b>4q</b> | C9--H9B...O1 <sup>Iii</sup>    | 0.99      | 2.48     | 3.46(2)   | 170     |
|           | N2—H2A...O1 <sup>IIii</sup>    | 0.9(2)    | 2.1(2)   | 2.951(18) | 160(15) |
|           | C9—H9A...O1 <sup>IIii</sup>    | 0.99      | 2.55     | 3.45(2)   | 151     |
|           | C13--H13...Br1 <sup>IIii</sup> | 0.95      | 3.00     | 3.836(14) | 147     |

Symmetry codes: (Ii)  $-x+1, -y+1, -z+1$ ; (IIi)  $x, -y, z-1/2$ ; (IIii)  $x, -y+1, z-1/2$ .

### X-ray structure determination

The X-ray measurements for **4i** and **4q** were carried out on an Agilent Supernova Dual diffractometer. CuK $\alpha$  radiation ( $\lambda = 1.54184$  Å) was used for both collections, which were controlled by CrysAlisPro<sup>6</sup> with data collected at 100(2)K. Data were corrected for Lorentz and polarization effects using and multi-scan absorption corrections were applied also using CrysAlisPro. Both structures were solved by direct methods (SHELXS-97),<sup>7</sup> and refined using full-matrix least-squares procedures (SHELXL-2014/7)<sup>8</sup> and Titan2000.<sup>9</sup> All non-hydrogen atoms were refined anisotropically and hydrogen atoms bound to carbon were placed in the calculated positions, and their thermal parameters were refined isotropically with  $U_{eq}(H) = 1.2U_{eq}(C)$ . The hydrogen atoms on N2 in both molecules were located in difference Fourier syntheses and their coordinates refined with  $U_{eq}(H) = 1.2U_{eq}(N)$ . All molecular plots and packing diagrams were drawn using Mercury,<sup>10</sup> and additional metrical data were calculated using PLATON.<sup>11</sup> Tables were prepared using WINGX.<sup>12</sup> Details of the X-ray measurements and crystal data for both compounds are given in Table S1. Data for compound **4q** were not of the

best quality. However, the data used here were obtained from the best of several samples that were tried. As a result the residuals for this structure are somewhat high which is clearly reflected in the uncertainties in the metrical data. Very high residual density in the vicinity of the Br14 atom in this structure may be the result of unresolved disorder but a suitable disorder model could not be established.

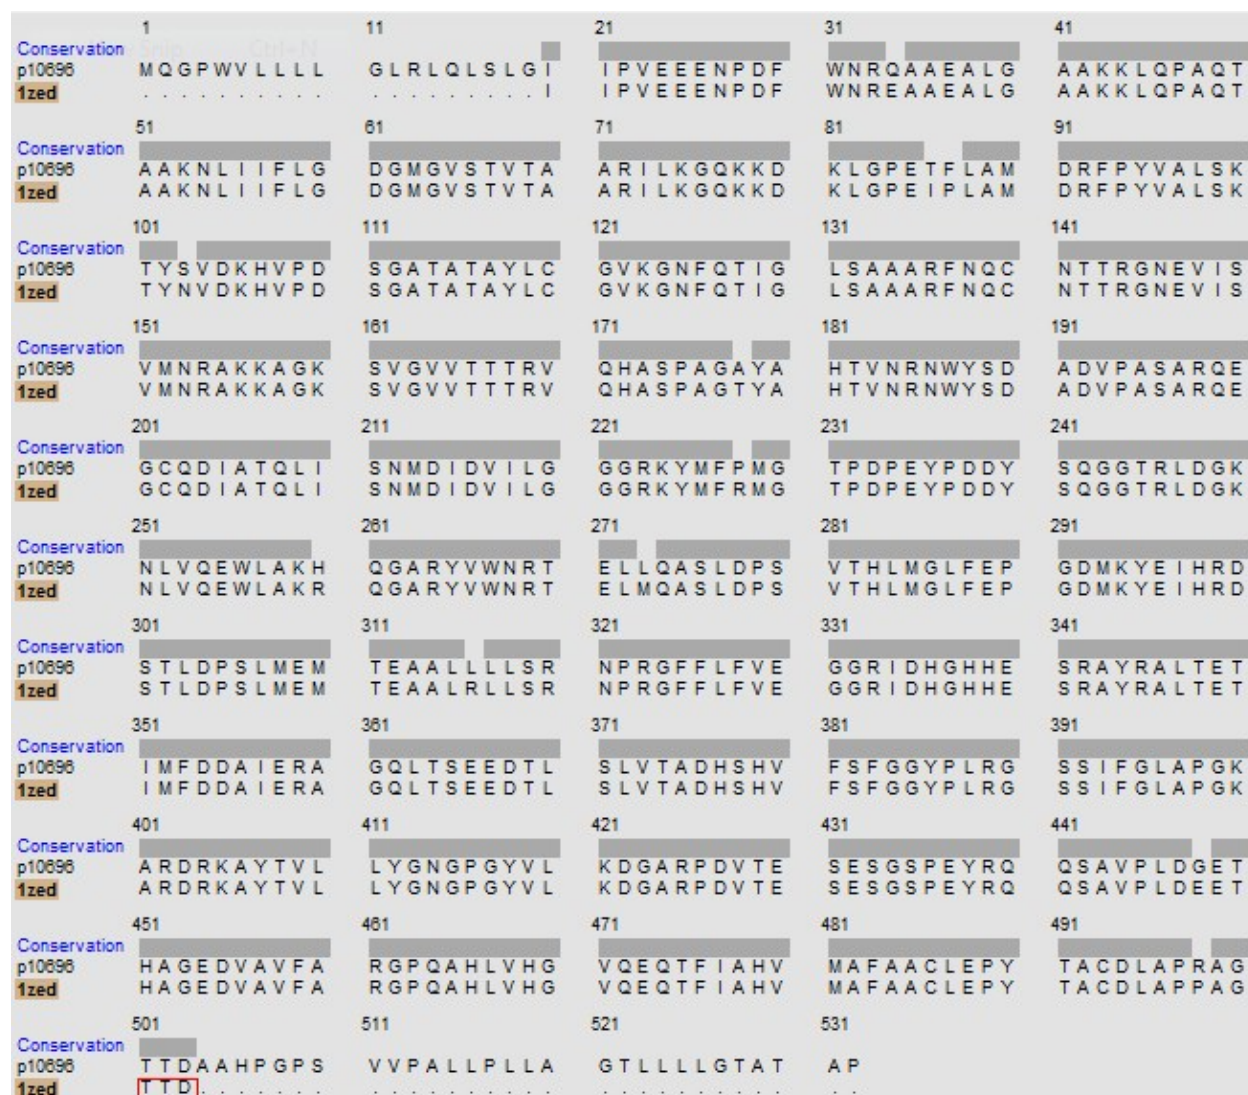

**Fig. S3** Sequence Alignment of target human derived germ cells alkaline phosphatase (h-GCAP) with template human derived placental alkaline phosphatase (PDB ID 1ZED). Where, the gray bars show the conservation of amino acids.

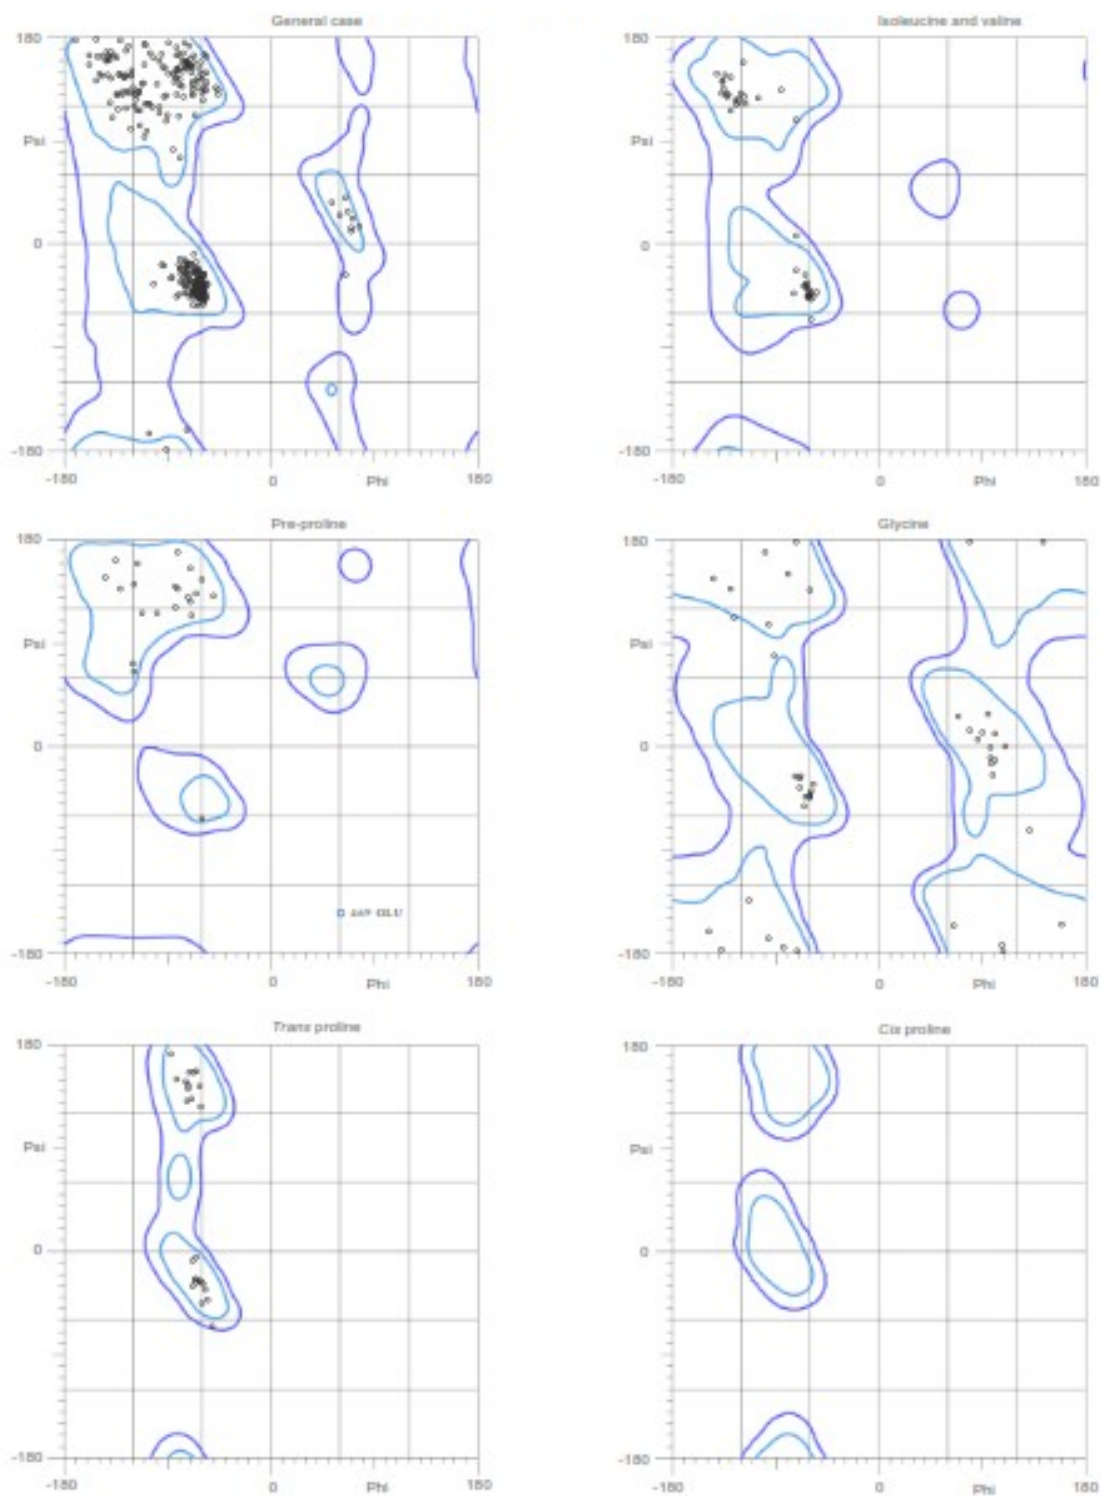

**Fig. S4** Ramachandran Plot of h-GCAP, 97.7% (471/482) of all residues lies in favored (98%) regions. 99.8% (481/482) of all residues lies in allowed (>99.8%) regions. Amino acid Glu469 is the only outlier.



**References**

1. C. R. Groom and F. H. Allen, *Angew. Chem. Int. Ed.*, 2014, **53**, 662–671.
2. A. S. Praveen, J. P. Jasinski, A. C. Keeley, H. S. Yathirajan and B. Narayana, *Acta Cryst.*, 2013, **E69**, o421.
3. A. S. Praveen, J. P. Jasinski, A. C. Keeley, H. S. Yathirajan and B. Narayana, *Acta Cryst.*, 2012, **E68**, o3435.
4. H.-K. Fun, M. Hemamalini, V. Sumangala, G. K. Nagaraja and B. Poojary, *Acta Cryst.* 2011, **E67**, o2835.
5. H.-K. Fun, M. Hemamalini, V. Sumangala, D. J. Prasad and B. Poojary, *Acta Cryst.*, 2011, **E67**, o2847.
6. Agilent, CrysAlis PRO. Agilent Technologies, Yarnton, Oxfordshire, England, 2013.
7. G. M. Sheldrick, *Acta Cryst.*, 2008, **A64**, 112–122.
8. G. M. Sheldrick, *Acta Cryst.*, 2015, **C71**, 3–8.
9. K. A. Hunter and J. Simpson, TITAN2000. University of Otago, New Zealand, 1999.
10. C. F. Macrae, I. J. Bruno, J. A. Chisholm, P. R. Edgington, P. McCabe, E. Pidcock, L. Rodriguez-Monge, R. Taylor, J. van de Streek and P. A. Wood, *J. Appl. Cryst.*, 2008, **41**, 466–470.
11. A. L. Spek, *Acta Cryst.*, 2009, **D65**, 148–155.
12. L. J. Farrugia, *J. Appl. Cryst.*, 2012, **45**, 849–854.
